# Supplementary material for: How Clinicians Conceptualize “Actionability” in Genomic Screening
Source: MDPI journal article supplement (doi:10.3390/jpm13020290), 2023-02-04
Supplement: s1 [file s1]

## Supplemental Materials S1

### Consolidated criteria for reporting qualitative studies (COREQ): 32-item checklist

Derived from: Tong, A.; Sainsbury, P.; Craig, J. Consolidated criteria for reporting qualitative research (COREQ): a 32-item checklist for interviews and focus groups. *Int J Qual Health Care* **2007**, *19*, 349-357, doi:10.1093/intqhc/mzm042.

| No. Item                                       | Guide questions/description                                                                                                               | This Research                                                                                                                                                                                                                                                                                                                          |
|------------------------------------------------|-------------------------------------------------------------------------------------------------------------------------------------------|----------------------------------------------------------------------------------------------------------------------------------------------------------------------------------------------------------------------------------------------------------------------------------------------------------------------------------------|
| <b>Domain 1: Research team and reflexivity</b> |                                                                                                                                           |                                                                                                                                                                                                                                                                                                                                        |
| <i>Personal Characteristics</i>                |                                                                                                                                           |                                                                                                                                                                                                                                                                                                                                        |
| 1. Interviewer/ facilitator                    | Which author/s conducted the interview or focus group?                                                                                    | Owens                                                                                                                                                                                                                                                                                                                                  |
| 2. Credentials                                 | What were the researcher's credentials? E.g. PhD, MD                                                                                      | PhD, MSME (Owens), PhD (Sankar), MA (Asfaha).                                                                                                                                                                                                                                                                                          |
| 3. Occupation                                  | What was their occupation at the time of the study?                                                                                       | Postdoctoral Fellow/Assistant Professor of Medical Ethics (Owens), Associate Professor of Medical Ethics (Sankar), Doctoral Candidate in Anthropology (Asfaha)                                                                                                                                                                         |
| 4. Gender                                      | Was the researcher male or female?                                                                                                        | All female                                                                                                                                                                                                                                                                                                                             |
| 5. Experience and training                     | What experience or training did the researcher have?                                                                                      | Dr. Owens is a sociologist and medical ethicist with expertise in qualitative research and in-depth interviewing. Dr. Sankar is a medical ethicist and leading scholar of the ethical, legal, and social implications of genetics/genomics. Ms. Asfaha is a Doctoral Candidate in Anthropology with expertise in ethnographic methods. |
| <i>Relationship with participants</i>          |                                                                                                                                           |                                                                                                                                                                                                                                                                                                                                        |
| 6. Relationship established                    | Was a relationship established prior to study commencement?                                                                               | No prior relationship.                                                                                                                                                                                                                                                                                                                 |
| 7. Participant knowledge of the interviewer    | What did the participants know about the researcher? e.g. personal goals, reasons for doing the research                                  | Professional background, research interests, reasons for doing this research.                                                                                                                                                                                                                                                          |
| 8. Interviewer characteristics                 | What characteristics were reported about the interviewer/facilitator? e.g. Bias, assumptions, reasons and interests in the research topic | Owens' training as a sociologist lends her a critical analytical toolkit, and her identity as a white, cis-het woman likely                                                                                                                                                                                                            |

*influences participant interactions.*

## **Domain 2: study design**

### *Theoretical framework*

|                                          |                                                                                                                                                          |                                                                                              |
|------------------------------------------|----------------------------------------------------------------------------------------------------------------------------------------------------------|----------------------------------------------------------------------------------------------|
| 9. Methodological orientation and Theory | What methodological orientation was stated to underpin the study? e.g. grounded theory, discourse analysis, ethnography, phenomenology, content analysis | <i>This study uses the principles of grounded theory [21] and situational analysis [22].</i> |
|------------------------------------------|----------------------------------------------------------------------------------------------------------------------------------------------------------|----------------------------------------------------------------------------------------------|

### *Participant selection*

|                        |                                                                                    |                                                                                                                                |
|------------------------|------------------------------------------------------------------------------------|--------------------------------------------------------------------------------------------------------------------------------|
| 10. Sampling           | How were participants selected? e.g. purposive, convenience, consecutive, snowball | <i>Purposive and snowball sampling</i>                                                                                         |
| 11. Method of approach | How were participants approached? e.g. face-to-face, telephone, mail, email        | <i>Contacted by e-mail by Dr. Owens</i>                                                                                        |
| 12. Sample size        | How many participants were in the study?                                           | <i>35</i>                                                                                                                      |
| 13. Non-participation  | How many people refused to participate or dropped out? Reasons?                    | <i>29 people did not respond to email requests or declined an interview. No one dropped out after beginning participation.</i> |

### *Setting*

|                                  |                                                                                   |                                                                                                                                                                                                                                                                                                                                                                         |
|----------------------------------|-----------------------------------------------------------------------------------|-------------------------------------------------------------------------------------------------------------------------------------------------------------------------------------------------------------------------------------------------------------------------------------------------------------------------------------------------------------------------|
| 14. Setting of data collection   | Where was the data collected? e.g. home, clinic, workplace                        | <i>At participants' homes or in their offices, online via Zoom.</i>                                                                                                                                                                                                                                                                                                     |
| 15. Presence of non-participants | Was anyone else present besides the participants and researchers?                 | <i>No</i>                                                                                                                                                                                                                                                                                                                                                               |
| 16. Description of sample        | What are the important characteristics of the sample? e.g. demographic data, date | <i>10 participants were primary care providers, 20 participants were clinical geneticists or genetic counselors, and 5 participants had expertise in both primary care and genetics. Participant demographics: Gender: 24 Women, 7 Men, 4 Not Reported. Race: 22 White, 5 Asian, 3 More than One Race, 5 Not Reported. Interviews were conducted between 2021-2022.</i> |

### *Data collection*

|                     |                                                                               |                                                                                                                                                               |
|---------------------|-------------------------------------------------------------------------------|---------------------------------------------------------------------------------------------------------------------------------------------------------------|
| 17. Interview guide | Were questions, prompts, guides provided by the authors? Was it pilot tested? | <i>Dr. Owens and Dr. Sankar developed the interview guide, provided in the supplemental material S2. The interview guide was pilot tested internally with</i> |
|---------------------|-------------------------------------------------------------------------------|---------------------------------------------------------------------------------------------------------------------------------------------------------------|

|                                        |                                                                                                                                 |                                                                                                                 |
|----------------------------------------|---------------------------------------------------------------------------------------------------------------------------------|-----------------------------------------------------------------------------------------------------------------|
|                                        |                                                                                                                                 | <i>Dr. Owens' colleagues, and revised accordingly.</i>                                                          |
| 18. Repeat interviews                  | Were repeat interviews carried out? If yes, how many?                                                                           | <i>No</i>                                                                                                       |
| 19. Audio/visual recording             | Did the research use audio or visual recording to collect the data?                                                             | <i>Audio and video recording</i>                                                                                |
| 20. Field notes                        | Were field notes made during and/or after the interview or focus group?                                                         | <i>Yes</i>                                                                                                      |
| 21. Duration                           | What was the duration of the interviews or focus group?                                                                         | <i>Approximately 30 minutes to 1 hour.</i>                                                                      |
| 22. Data saturation                    | Was data saturation discussed?                                                                                                  | <i>Yes, interviews stopped once data saturation was reached.</i>                                                |
| 23. Transcripts returned               | Were transcripts returned to participants for comment and/or correction?                                                        | <i>No</i>                                                                                                       |
| <b>Domain 3: analysis and findings</b> |                                                                                                                                 |                                                                                                                 |
| <i>Data analysis</i>                   |                                                                                                                                 |                                                                                                                 |
| 24. Number of data coders              | How many data coders coded the data?                                                                                            | <i>Two (Owens and Asfaha)</i>                                                                                   |
| 25. Description of the coding tree     | Did authors provide a description of the coding tree?                                                                           | <i>No</i>                                                                                                       |
| 26. Derivation of themes               | Were themes identified in advance or derived from the data?                                                                     | <i>Both</i>                                                                                                     |
| 27. Software                           | What software, if applicable, was used to manage the data?                                                                      | <i>NVivo</i>                                                                                                    |
| 28. Participant checking               | Did participants provide feedback on the findings?                                                                              | <i>No</i>                                                                                                       |
| <i>Reporting</i>                       |                                                                                                                                 |                                                                                                                 |
| 29. Quotations presented               | Were participant quotations presented to illustrate the themes/findings? Was each quotation identified? e.g. participant number | <i>Participant quotations are included and identified only by professional training, to preserve anonymity.</i> |
| 30. Data and findings consistent       | Was there consistency between the data presented and the findings?                                                              | <i>Yes</i>                                                                                                      |
| 31. Clarity of major themes            | Were major themes clearly presented in the findings?                                                                            | <i>Yes</i>                                                                                                      |
| 32. Clarity of minor themes            | Is there a description of diverse cases or discussion of minor themes?                                                          | <i>Yes</i>                                                                                                      |
